# Supplementary material for: Hydrophilic–hydrophobic hybrid gel for effective humidity capture and response
Source: Royal Society of Chemistry journal article supplement (doi:10.1039/d3nj00161j), 2023-01-01
Supplement: d3nj00161j1.pdf [file d3nj00161j1.pdf]

## **Hydrophilic-Hydrophobic Hybrid Gel for Effective Humidity Capture and Response**

Shu-Hua Ma, Feng-Lian Zeng, Xue-Ting Jin, Hui Dong, Min Liu, and Yang-Hui

Luo\*

School of Chemistry and Chemical Engineering, Southeast University,

Nanjing, 211189, P.R. China. E-mail: luoyh2016@seu.edu.cn

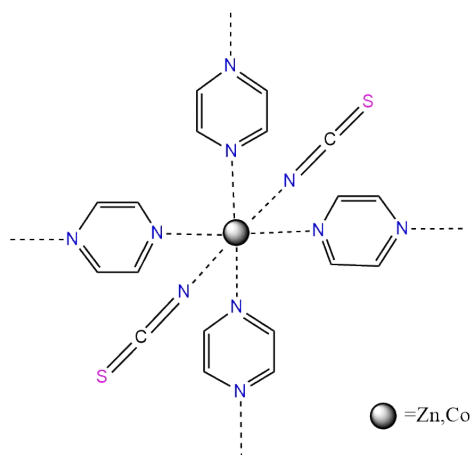

**Figure S1.** Coordination environment for center metal ions of  $[\text{Zn}(\text{NCS})_2(\text{pyrazine})_2]$  and  $[\text{Co}(\text{NCS})_2(\text{pyrazine})_2]$ .

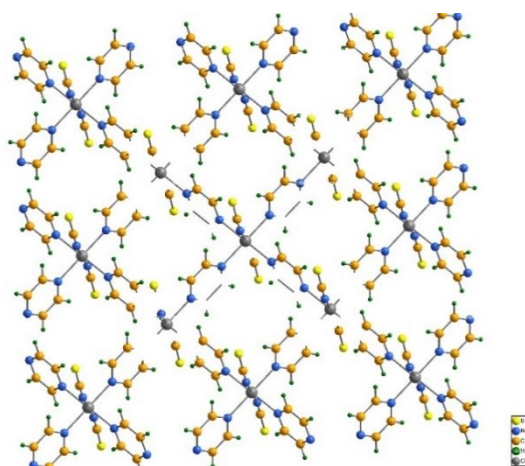

**Figure S2.** Single-layer structure of  $[\text{Zn}(\text{NCS})_2(\text{pyrazine})_2]$  and  $[\text{Co}(\text{NCS})_2(\text{pyrazine})_2]$ .

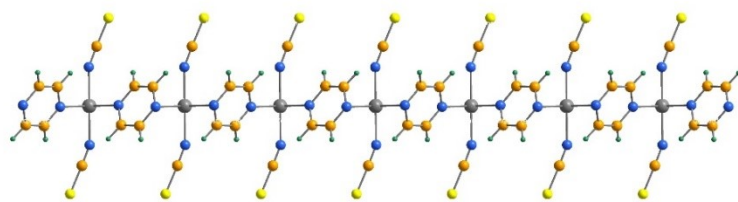

**Figure S3.** Side view of a single layer structure of  $[\text{Zn}(\text{NCS})_2(\text{pyrazine})_2]$  and  $[\text{Co}(\text{NCS})_2(\text{pyrazine})_2]$ .

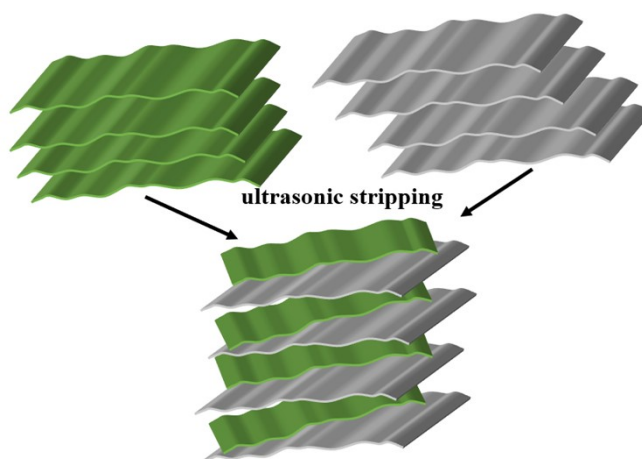

**Figure S4.** The assembly method of SHM.

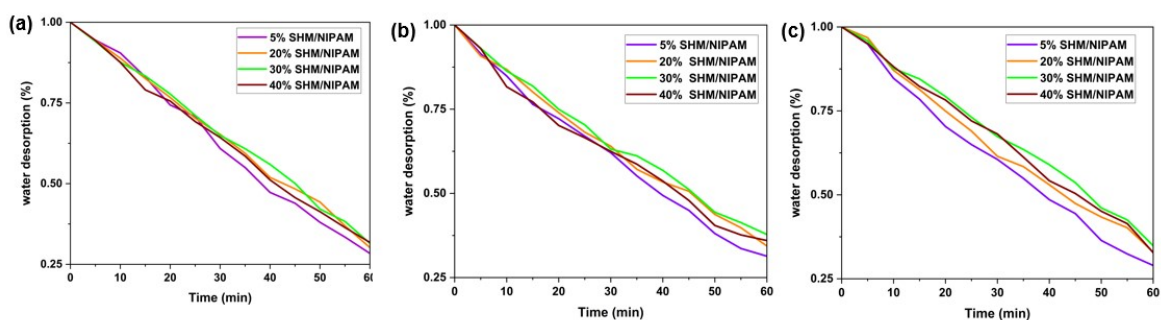

**Figure S5.** The ratio of the difference value (the mass of hybrid gel at a certain moment subtracts the original dry weight of hybrid gel) to the initial water adsorption mass of the hybrid gel with time at (a) RH=43% (b) RH=90% (c) RH=98% during the process of desorption.

**Table S1.** R、G、B and G/B of 30% SHM/NIPAM gel color change with time during water adsorption.

| Time/min | R   | G   | B   | G/B  |
|----------|-----|-----|-----|------|
| 0        | 4   | 8   | 59  | 0.14 |
| 20       | 13  | 17  | 68  | 0.25 |
| 35       | 9   | 20  | 64  | 0.31 |
| 50       | 0   | 40  | 92  | 0.43 |
| 200      | 12  | 45  | 76  | 0.59 |
| 300      | 46  | 76  | 102 | 0.75 |
| 360      | 23  | 71  | 91  | 0.78 |
| 400      | 70  | 85  | 90  | 0.94 |
| 500      | 114 | 126 | 132 | 0.95 |
| 540      | 68  | 87  | 86  | 1.01 |
| 600      | 158 | 138 | 127 | 1.09 |
| 700      | 147 | 124 | 109 | 1.14 |
